# Supplementary material for: Inhibition of IL-13 and IL-13Rα2 Expression by IL-32θ in Human Monocytic Cells Requires PKCδ and STAT3 Association
Source: PubMed Central journal article supplement (PMC6514684; doi:10.3390/ijms20081949), 2019-04-20
Supplement: ijms-20-01949-s001.pdf [file ijms-20-01949-s001.pdf]

## Supplementary Materials

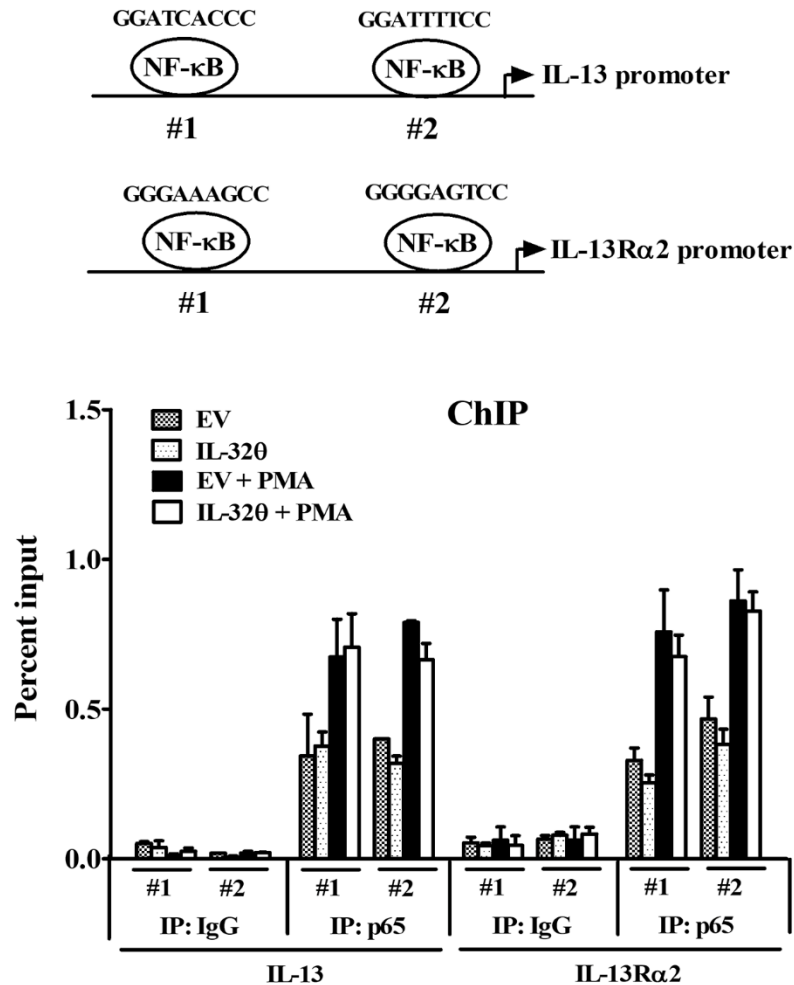

**Supplementary Figure S1.** The NF- $\kappa$ B binding sites of IL-13 or IL-13R $\alpha$ 2 promoters were not mediated by IL-320. Up panel, diagram showing putative element sites for NF- $\kappa$ B binding to IL-13 or IL-13R $\alpha$ 2 promoters. Down panel, ChIP assay ( $n = 3$ ) was conducted by performing immunoprecipitation of p65, an NF- $\kappa$ B subunit, followed by quantitative PCR using specific primers to target 2 binding sites of p65 in the IL-13 promoter and 2 binding sites in the IL-13R $\alpha$ 2 promoter. Data are shown as mean  $\pm$  SEM. Statistical significance was analyzed using two-way ANOVA test followed by multiple comparison tests. The results are not statistically significant.

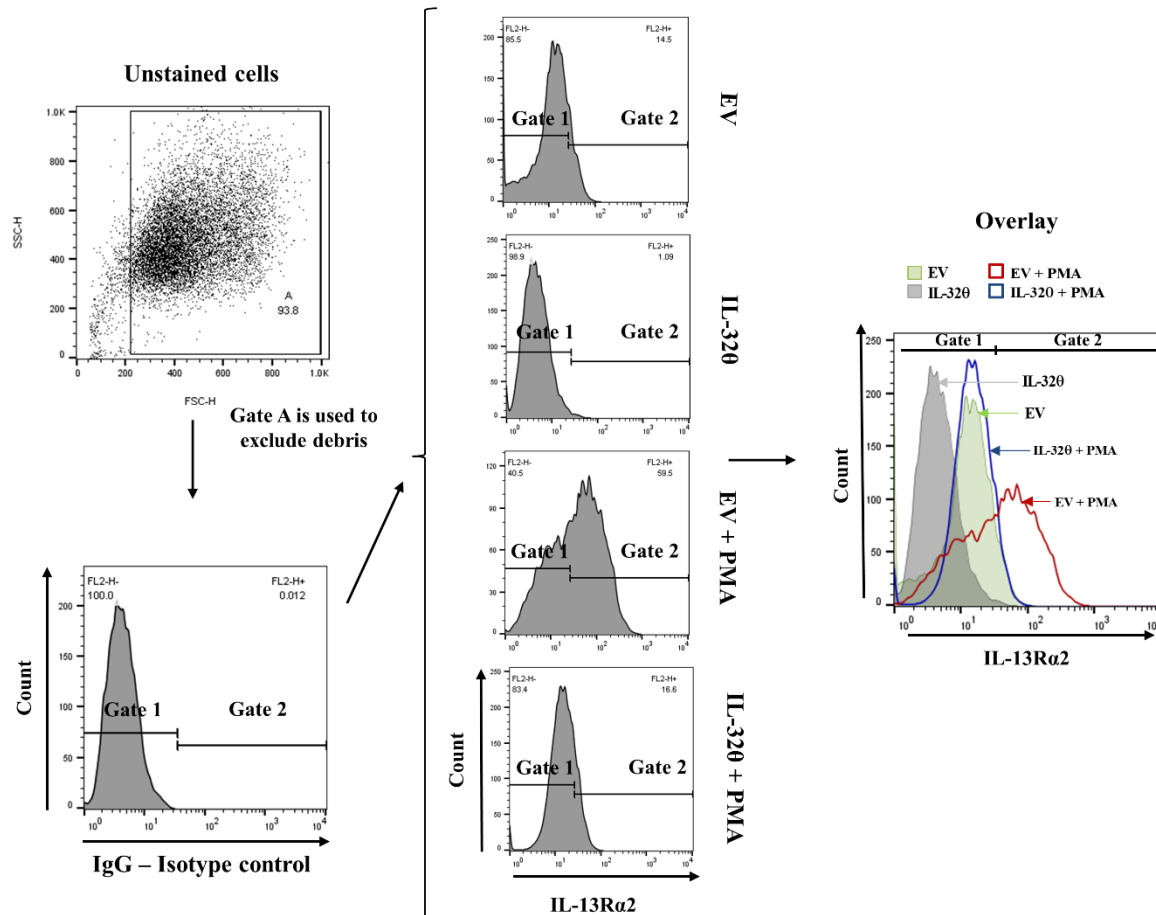

**Supplementary Figure S2.** Flow cytometry analysis gating strategy. First, cell populations were distinguished based on their forward and side scatter properties. Since THP-1 cells are monocytic cells, there is only one population of cells. Gate A was created to exclude debris and dead cells. Second, the cells within the Gate A can be further analyzed for isotype control expression by single parameter histogram. Based on the histogram of isotype control, two gates were created: Gate 1 contains 100% of cells in isotype control peak area, reflecting the cells which do not express IL-13R $\alpha$ 2, gate 2 contains the rest of the cells, reflecting the cells which express IL-13R $\alpha$ 2. Third, the Gate1/Gate 2 system was applied to each group of cells separately (EV, IL-320, EV+PMA, IL-320+PMA), and then the quantification was performed. Fourth, the overlay image is created as a representative image containing all histogram peaks of one set of experiment.
